1    **Structural Thalamocortical Network Atrophy in Sporadic**

2    **Behavioural Variant Frontotemporal Dementia**

3    David Jakabek 1, Brian D. Power 2, Nicola Spotorno 3, Matthew D. Macfarlane 4,  
4    Mark Walterfang 5, Dennis Velakoulis 5, Christer Nilsson 3, Maria Landqvist Waldö  
5    6, Jimmy Lätt 7, Markus Nilsson 8, Danielle van Westen 9, Olof Lindberg 3, Jeffrey  
6    C. L. Looi 10 \*, Alexander F. Santillo 3 \*

7    \* co-senior authors

8    1. Neuroscience Research Australia, Sydney, Australia.

9    2. School of Medicine, The University of Notre Dame Australia, Fremantle, Australia.

10    3. Department of Clinical Sciences, Clinical Memory Research Unit, Faculty of  
11    Medicine, Lund University, Lund/Malmö, Sweden.

12    4. Illawarra Shoalhaven Local Health District, New South Wales, Australia.

13    5. Neuropsychiatry, Royal Melbourne Hospital, Melbourne, Australia; Department of  
14    Psychiatry, University of Melbourne, Melbourne, Australia.

15    6. Clinical Sciences Helsingborg, Department of Clinical Sciences, Lund University,  
16    Lund, Sweden.

17    7. Department of Clinical Sciences Lund, Radiology. Lund University, Lund/Malmö,  
18    Sweden.

19    8. Department of Clinical Sciences Lund, Radiology. Lund University, Lund/Malmö,  
20    Sweden.

1 9. Image and Function; Skane University Hospital, Lund, Sweden & Diagnostic

2 Radiology, Institution for Clinical Sciences, Lund University, Lund, Sweden.

3 10. Academic Unit of Psychiatry and Addiction Medicine, The Australian National

4 University School of Medicine and Psychology, Canberra Hospital, Canberra,

5 Australian Capital Territory, Australia.

6

7

8 Corresponding author:

9 David Jakabek - [djakabek@gmail.com](mailto:djakabek@gmail.com)

10

## 1 Abstract

2 Using multi-block methods we combined multimodal neuroimaging metrics of  
3 thalamic morphology, thalamic white matter tract diffusion metrics, and cortical  
4 thickness to examine changes in behavioural variant frontotemporal dementia.  
5 (bvFTD). Twenty-three patients with sporadic bvFTD and 24 healthy controls  
6 underwent structural and diffusion MRI scans. Clinical severity was assessed using  
7 the Clinical Dementia Rating scale and behavioural severity using the Frontal  
8 Behaviour Inventory by patient caregivers. Thalamic volumes were manually  
9 segmented. Anterior and posterior thalamic radiation fractional anisotropy and mean  
10 diffusivity were extracted using Tract-Based Spatial Statistics. Finally, cortical  
11 thickness was assessed using Freesurfer. We used shape analyses, diffusion measures,  
12 and cortical thickness as features in sparse multi-block partial least squares (PLS)  
13 discriminatory analyses to classify participants within bvFTD or healthy control  
14 groups. Sparsity was tuned with five-fold cross-validation repeated 10 times. Final  
15 model fit was assessed using permutation testing. Additionally, sparse multi-block  
16 PLS was used to examine associations between imaging features and measures of  
17 dementia severity. The main features predicting bvFTD group membership were  
18 bilateral anterior-dorsal thalamic atrophy, increase in mean diffusivity of thalamic  
19 projections, and frontotemporal cortical thinning. The model had a sensitivity of 96%,  
20 specificity of 68%, and was statistically significant using permutation testing ( $p =$   
21 0.012). For measures of dementia severity, we found similar involvement of regional  
22 thalamic and cortical areas as in discrimination analyses, although more extensive  
23 thalamo-cortical white matter metric changes. Using multimodal neuroimaging, we  
24 demonstrate combined structural network dysfunction of anterior cortical regions,  
25 cortical-thalamic projections, and anterior thalamic regions in sporadic bvFTD.

1 Abstract

2 248 words.

3

4 Manuscript

5 3942 words

6

7 Keywords

8 Behavioural variant frontotemporal dementia; MRI; partial least squares; shape

9 analysis; diffusion

10

11 Abbreviations

12 bvFTD, behavioural variant frontotemporal dementia; FA fractional anisotropy; MD,

13 mean diffusivity, FDR, false discovery rate; SPHARM-PDM, spherical harmonic

14 point distribution model; PLS, partial least squares; PLS-DA, partial least squares -

15 discriminant analysis.

16

## 1           1. Introduction

2   Behavioural variant frontotemporal dementia (bvFTD) is a common cause of younger  
3   onset dementia and is characterised by alterations to personality, cognition, and  
4   behaviour. Most cases are sporadic, although genetic mutations (e.g., microtubule-  
5   associated protein tau, *MAPT*; progranulin, *GRN*; and chromosome 9 open reading  
6   frame 72, *C9ORF72*) have been identified in approximately 20% of cases  
7   (Blauwendraat et al., 2018; Wagner et al., 2021). While bvFTD is characterised  
8   clinically by frontal and temporal lobe cortical atrophy (Rascovsky et al., 2011), there  
9   is also degeneration of subcortical brain structures (Brettschneider et al., 2014;  
10   Hornberger et al., 2012). The relative contributions of subcortical and cortical atrophy  
11   to the clinical presentation remain unclear. Our interest is in bvFTD as a failure of  
12   subcortical-cortical networks (Looi et al., 2014), possibly through a prion-like spread  
13   of pathology (Hock & Polymenidou, 2016). From a network perspective, the thalamus  
14   has known anatomical projections that modulate and integrate signals between diverse  
15   cortical and subcortical areas (Hwang et al., 2017; Sherman, 2007). Thus, the  
16   thalamus is of strategic interest as a key hub in a potential network neuropathological  
17   model of bvFTD.

18   In bvFTD, thalamic structural atrophy, reduced white matter connectivity, and  
19   abnormal functional connectivity has been demonstrated in neuroimaging and  
20   neuropathological studies in both sporadic and genetic bvFTD cases. Patients with  
21   *C9ORF72* genotypes had more histological thalamic degeneration compared to  
22   sporadic bvFTD (Yang et al., 2017), and FDG-PET studies demonstrated significant  
23   thalamic hypometabolism in *C9ORF72* bvFTD compared to sporadic bvFTD (Diehl-  
24   Schmid et al., 2019). Other research using MRI segmentation has demonstrated that  
25   while thalamic atrophy is maximal in *C9ORF72* genotype (Cash et al., 2018),

1 thalamic atrophy is present in all bvFTD genetic groups (Bocchetta et al., 2018). In  
2 diffusion imaging studies, the anterior thalamic radiations have repeatedly  
3 demonstrated decreased fractional anisotropy (FA) and increased mean diffusivity  
4 (MD) in bvFTD (Daianu et al., 2016; Mahoney et al., 2014; Möller et al., 2015;  
5 Zhang et al., 2009), and these diffusion measures are associated with the degree of  
6 executive impairment (Tartaglia et al., 2012). A functional network study of bvFTD  
7 found reduced connectivity within the salience network, localised to the medial  
8 pulvinar of the thalamus (Lee et al., 2014). Thus, atrophy of the thalamus, reduced  
9 thalamic structural connectivity, and reduced functional corticothalamic connectivity  
10 are observed in bvFTD.

11 Although these studies mostly suggest global thalamic atrophy (having examined the  
12 thalamus as a homogeneous neural structure), the thalamus, being composed of  
13 multiple nuclei each associated a diverse range of neural functions, should be rather  
14 be considered and explored as a heterogeneous structure, particularly given the  
15 varying phenotype in bvFTD (Power & Looi, 2015). Changes in regional thalamic  
16 morphology may be observed as a marker of neurodegenerative changes in specific  
17 thalamic nuclei. Analogously, our understanding of cortical function would be unduly  
18 constrained if we were limited to study whole cortical volume as our only outcome  
19 variable. Studies addressing regional thalamic atrophy in sporadic bvFTD are limited.  
20 A structural study in a cohort of heterogeneous genetic carriers and sporadic cases  
21 found atrophy in anterior thalamic regions which preceded symptomatic bvFTD  
22 (Cury et al., 2019). This is in keeping with the known connectivity of the anterior  
23 parts of the thalamus to frontal lobes (Behrens et al., 2003). However, this contrasts  
24 with functional network research which noted medial pulvinar hypometabolism in  
25 *C9ORF72* carriers (Lee et al., 2014). Our previous study, using probabilistic diffusion

1 segmentation of the thalamus, demonstrated atrophy of regions connected to the  
2 dorsolateral prefrontal cortex, contrasting with hypertrophy of thalamic regions  
3 connected to the medial frontal cortex (Jakabek et al., 2018).

4 Regional thalamic atrophy can be assessed using statistical shape analyses. However,  
5 shape analyses share many of the broader statistical challenges of neuroimaging data,  
6 including relatively small sample sizes for the thousands of imaging elements which  
7 form dependent variables. Mass univariate testing with correction for multiple  
8 comparisons (such as false-discovery rate (FDR) correction) is commonly employed  
9 in shape analyses (e.g., spherical harmonic point correspondence framework,  
10 SPHARM-PDM (Styner et al., 2006). Alternatively, dimension reduction techniques  
11 such as partial least squares (PLS) can be combined with sparse feature selection,  
12 discrimination analysis (PLS-DA), and multimodal analyses for integrative analyses  
13 across feature sets (Chen et al., 2009). Importantly, the latter multi-block methods  
14 allow integration of multimodal datasets (e.g., shape, structural, and diffusion data) to  
15 be associated with an outcome variable (e.g., disease status) to better describe  
16 neuroimaging phenotypes of diseases (e.g., Avants et al., 2014, 2021; Hoagey et al.,  
17 2019; McIntosh & Lobaugh, 2004).

18 From a methodological perspective we aim to apply shape analysis within a multi-  
19 block sparse partial least squares analysis strategy to allow us to simultaneously  
20 approach three facets of thalamic degeneration: thalamic atrophy via shape change,  
21 frontal-thalamic degeneration via altered diffuse tensor imaging metrics, and cortical  
22 atrophy. To our knowledge, this approach, which allows more detailed mapping of the  
23 structural integrity of corticothalamic circuitry, has not been applied previously.  
24 Secondly, from a clinical perspective, we aim to describe the involvement of

1 thalamic subregions in sporadic bvFTD and the relationship of subregional change to  
2 cortical, tractographic and clinical features. We hypothesise that:

3 1) Patients with sporadic bvFTD, compared to healthy controls, will have thalamic  
4 volumetric atrophy which is predominantly driven by anterior and pulvinar regions in  
5 shape analyses; and thalamic-cortical tracts will show reduced fractional anisotropy  
6 (FA) and increased mean diffusivity (MD), and;

7 2) Cortical, shape, and white matter changes will be correlated across known  
8 corresponding cortical-subcortical regions and pathways, and;

9 3) The extent of volume, shape, and diffusion measure changes in sporadic bvFTD  
10 will relate to the severity of clinical measures.

11



## 1        2. Materials and methods

### 2        2.1 Participants

3        Participants in this study were enrolled in the Lund Prospective Frontotemporal  
4        Dementia Study (LUPROFS) (see Santillo et al., 2013). The diagnosis of bvFTD was  
5        made according to International bvFTD Consortium Criteria (Rascovsky et al., 2011).  
6        Assessments included clinical interview, informant history with ratings of behavioural  
7        disturbances and disease severity, clinical examination, neuropsychological  
8        assessment (outlined below for bvFTD participants), brain MRI (structural and  
9        diffusion imaging), genetic testing, and cerebrospinal fluid analysis of amyloid-beta-  
10       42, total tau, and phosphorylated tau (indicators of Alzheimer’s Disease). Healthy  
11       controls underwent a similar assessment but did not undergo genetic testing. Genetic  
12       screening for expansions/mutations in the genes of *C9ORF72*, *MAPT*, and *GRN* was  
13       performed in all patients. We excluded three patients with genetic variant bvFTD to  
14       focus on sporadic bvFTD. Post-mortem neuropathological examination was  
15       performed for a limited number of patients. Two patients and two control participants  
16       did not undergo diffusion imaging and so were excluded. Ethical approval was  
17       obtained from the Regional Ethical Review Board, Lund, Sweden, and the Australian  
18       National University. Issues around obtaining informed consent in the LUPROFS  
19       cohort have been outlined previously (see Macfarlane et al., 2015).

20

### 21       2.2 Clinical severity and behavioural ratings

22       For disease severity the LUPROFS study utilised the Frontotemporal Lobar modified  
23       Clinical Dementia Rating (FLTD-CDR) score (Knopman et al., 2008). We utilised the  
24       “sum of boxes” aggregate score (FTLD-CDR-SB) for subsequent analysis as it is

1 more normally distributed. For quantification of behavioural disturbances the Frontal  
2 Behavioural Inventory (FBI) was utilised (Kertesz et al., 1997). The FBI rates 24  
3 behaviours on a 0-3 scale (with higher scores reflecting more severe disturbance); FBI  
4 items 1-10 represent negative symptoms (e.g., apathy and neglect), and FBI items 12-  
5 22 represent positive symptoms (e.g., impulsivity and hyperorality), and reporting  
6 these composites FBI<sup>1-10</sup>, FBI<sup>12-22</sup>) is common in bvFTD studies (Kertesz et al., 1997;  
7 Macfarlane et al., 2015; Zamboni et al., 2008). Participants with bvFTD underwent  
8 both bedside cognitive and full neuropsychological testing. However, due to the small  
9 number of participants who completed all subscales without floor effects, the  
10 neuropsychological tests were not analysed further.

11

### 12 2.3 Magnetic Resonance Imaging

13 MRI was performed using a 3.0T Philips MR scanner, with an eight-channel head coil  
14 (Philips Achieva®, Philips Medical Systems, Best, The Netherlands). High resolution  
15 anatomical images were acquired using a T1-weighted turbo field echo pulse  
16 sequence (TR 8ms; TE 4ms; T1 650 ms; FA 10°; NEX2; SENSE-factor 2.4; matrix  
17 240×240; FOV 240×240 mm<sup>2</sup>; resulting voxel size 1×1×1 mm<sup>3</sup>); 175 contiguous  
18 coronal slices were obtained. Diffusion weighted imaging (DWI) was performed with  
19 an echo-planar single-shot spin echo sequence. Diffusion encoding was performed in  
20 48 directions at b-value = 800 s/mm<sup>2</sup>, one b-value=0 volume, isotropic voxel size  
21 2×2×2 mm<sup>3</sup>, TR 7881 ms, and TE 90 ms.

22

## 1 2.4 Thalamic segmentation

2 Boundary tracing was performed by an experienced investigator (BDP) who had  
3 previously developed a protocol for manual segmentation of the dorsal thalamus on  
4 T1 MRI scans (Power et al., 2015) using ANALYZE 11.0 software (Mayo  
5 Biomedical Imaging Resource, Rochester, Minnesota, USA). The investigator was  
6 blind to the clinical status of participants while conducting manual segmentation  
7 analysis. Reliability of image analysis was performed by measuring intra-class  
8 correlations (type A intra-class correlation coefficients using an absolute agreement  
9 definition; scores 0.95 and 0.98) between initial segmentation and random repeated  
10 segmentation of both left and right thalami of 5 subjects (a total of 10 measurements)  
11 (Power et al., 2015), calculated in SPSS 17.0 (IBM Corporation, Somers, New York,  
12 USA).

13

## 14 2.5 Shape analysis

15 Manual thalamic segmentations were pre-processed by iterative rigid alignment to a  
16 study-specific thalamic template using the advanced normalisation tools package  
17 (Avants et al., 2008) and subsequently, 3D models were constructed of the aligned  
18 segmentations using the marching cubes algorithm. Shape processing of the thalamus  
19 was conducted using the Deformetrica 4.0.3 software which utilises large deformation  
20 diffeomorphic metric mapping (Bône et al., 2018; Durrleman et al., 2014). Briefly,  
21 the deformation from the template model to each participant's model was described  
22 using deformation vectors ("momenta") in 3D space (object kernel width = 3, noise =  
23 3, and deformation kernel = 5) yielding 450 momenta for each shape. These momenta  
24 were utilised in the subsequent PLS family of analyses. Momenta which were selected  
25 following sparsity analyses (see below) were then projected from the template shape.

1 For visualisation purposes, the template shape was deformed according to PLS  
2 loadings, and the displacement along the vertex normals between the deformed shape  
3 and the template shape are displayed. Lastly, we compared this approach against the  
4 SPHARM-PDM shape analysis methodology as detailed in the supplemental  
5 information.

6

## 7 [2.6 Cortical analyses](#)

8 T1 scans were processed using Freesurfer 6.0 software (<http://surfer.nmr.mgh.harvard.edu>). Briefly, grey, white, and cerebrospinal fluid boundaries are  
9 automatically determined, and parcellation was performed using the Desikan–Killiany  
10 atlas (Desikan et al., 2006). Cortical thickness was extracted, calculated as the closest  
11 distance from the gray/white boundary to the gray/CSF boundary at each vertex on  
12 the surface (Fischl & Dale, 2000).

14

## 15 [2.7 DTI analyses](#)

16 The DWI data were corrected for motion and eddy current induced artifacts using an  
17 extrapolation-based registration approach (Nilsson et al., 2015). The diffusion tensor  
18 model was subsequently fitted using FMRIB Software Library to compute FA and  
19 MD. Tract-based spatial statistics pipeline (Smith et al., 2006) was then applied. In  
20 brief, the FA maps were warped to the FMRIB58\_FA standard template using FSL's  
21 non-linear registration tool. All the warped FA maps were subsequently averaged to  
22 create a mean FA template, from which the FA skeleton was computed. Both the FA  
23 and the MD maps of each participant were then projected onto the skeleton. The  
24 anterior and posterior thalamic radiations were defined using the Johns Hopkins

1 University white matter atlas (JHU, available in FSL (Hua et al., 2008)). The mask of  
2 the tract of interest were intercepted with study-wise FA skeleton and the median  
3 values of FA, MD were extracted from each tract for each participant.

4

## 5 2.8 Statistical analyses

6 All analyses were conducted in R version 3.6 and for the PLS family of analyses we  
7 used the mixOmics package (Rohart et al., 2017; Singh et al., 2019). Comparisons of  
8 demographic data, cortical thickness, and DTI data were conducted using linear  
9 models, and for gender, using Pearson Chi-square. For shape analyses data were  
10 controlled for intracranial volume and age, whilst analyses of DTI and and cortical  
11 thickness measures were controlled for age only. To control for covariates in PLS  
12 analyses, covariates were regressed out from relevant measures and the regression  
13 residuals used for subsequent analyses. We utilised Bonferroni-like corrections for  
14 analyses of DTI data (significant  $p < 0.012$ , 0.05 corrected for 4 tracts) and cortical  
15 regions (significant  $p < 0.001$ , 0.05 corrected for 34 parcellations and expecting non-  
16 independence between hemispheres).

17 Our primary analysis involved sparse multi-block partial least squares analysis (multi-  
18 block sPLS). For all analyses we combined left and right hemisphere data in each  
19 block. We used discrimination analysis for the categorial outcome of healthy control  
20 vs sporadic bvFTD classification, and regression models for the behavioural measures  
21 of bvFTD (i.e., FTLN-CDR-SB, FBI scores, and FBI subscales). Given the modest  
22 sample size we used nested-cross validation for sparsity tuning to reduce over-fitting  
23 and improve generalisation (Cawley & Talbot, 2010). We used 5-fold cross validation  
24 in the outer loop over 10 repeats, and 4-fold cross validation repeated 20 times for the

1 inner loop, across all permutations of shape, cortical, and diffusion measures. We  
2 selected the sparsity parameters with the lowest balanced error rate of the centroids  
3 distance (for the categorical measure) or mean square error (for continuous measures).  
4 One principal component was specified in all analyses. Final model significance was  
5 determined by permutation of either group labels or behavioural scores using 1000  
6 repeats. Significance for PLS analyses was  $p < 0.05$  and indicates that the final model  
7 predictive ability of group membership or behavioural scores is less likely to occur by  
8 chance alone. Our R code for all shape and PLS analyses are publicly available at:  
9 <https://github.com/djakabek/multimodal>  
10 Additionally, validation of this multi-block sPLS approach was conducted using  
11 standard SPHARM analysis pipelines and non-sparse partial least squares analysis.  
12 These validation analyses are detailed in the supplemental material.

13

## 14 3. Results

### 15 3.1 Sample demographics

16 Demographic, clinical, and thalamus structural data of patients included in the study  
17 are presented in Table 1. Of the 23 eligible participants with bvFTD, 17 had probable  
18 FTD, and 6 had definite bvFTD according to consortium criteria. Participants with  
19 bvFTD did not statistically differ from healthy controls on age or gender ( $p > 0.3$ ),  
20 although did have fewer years of education ( $p = 0.012$ ).

21

### 22 3.2 Group comparisons

23 The total left thalamus was significantly smaller in volume in patients with bvFTD  
24 compared to controls (Beta = -757, 95% CI -757 to -89,  $p = 0.014$ ). The right

1 thalamus was also smaller in patients with bvFTD compared to controls however this  
2 was not statistically significant (Beta = -247, 95% CI -585 to 91,  $p = 0.147$ ).

3 Diffusion measures between groups are shown in Table 2 and demonstrate that in  
4 bvFTD there is significantly lower FA and higher MD for both anterior and posterior  
5 thalamic radiations. Lastly, significant cortical thinning was observed in bilateral  
6 frontal regions (coefficients provided in supplemental table 1).

7 Group differences using multi-block sPLS-DA are displayed in Figure 1. Sparsity  
8 tuning selected 480 thalamic deformation momenta, 56 cortical regions, and 4 DTI  
9 measures across both hemispheres. In the bvFTD patient group there was reduced  
10 bilateral cortical thickness in anterior regions (orbitofrontal, dorsolateral, and medial  
11 prefrontal) and the left insula. There was anterior-dorsal deflation in bilateral thalami,  
12 and deflation in the left mediodorsal region. An increase in MD for the bilateral  
13 anterior thalamic radiations had the highest weight in discriminating between healthy  
14 controls from patients with bvFTD, and reduced FA of the right anterior thalamic  
15 radiation and increased MD of the right posterior thalamic radiation were also found  
16 to discriminate between groups. This model misclassified one healthy control and  
17 seven bvFTD patients (sensitivity = 96%, specificity = 68%) and was statistically  
18 significant using permutation testing ( $p = 0.019$ ).

19

### 20 3.3 Clinical severity and behavioural measures

21 Using volumetric measures and linear regression, there was significant reductions in  
22 total thalamic volumes associated with FTLN-CDR-SB scores (left Beta = -105, SE =  
23 30,  $p = 0.002$ ; right Beta = -78, SE = 34,  $p = 0.031$ ), the FBI total score (left Beta = -55,  
24 SE = 13,  $p = 0.001$ ; right Beta = -35, SE = 15,  $p = 0.037$ ), and the FBI 1-10 score (left

1    Beta = -88, SE = 14,  $p < 0.001$ , right Beta = -52, SE = 21,  $p = 0.024$ ). The FBI 12-20  
2    score was not significant associated with either thalamus volume ( $p > 0.255$ ). No  
3    significant associations were observed for regional cortical or DTI with clinical  
4    severity or behavioural measures using a corrected p-value threshold (coefficients  
5    provided in supplemental information).

6    By contrast, significant cortical, shape, and diffusion associations were observed  
7    using multi-block sPLS methodology. For the FTLD-CDR-SB score model (shown in  
8    Figure 2) there were 56 cortical regions, 510 momenta directions, and all DTI tracts  
9    selected,  $r = 0.74$ ,  $p = 0.01$ . Similar significant findings were for the FBI total score  
10    (Figure 3, 46 cortical regions, 190 thalamic momenta, all DTI tracts,  $r = 0.69$ ,  $p =$   
11     $0.02$ ) and FBI 1-10 score (Figure 4, 26 cortical regions, 120 thalamic momenta, all  
12    DTI tracts,  $r = 0.69$ ,  $p = 0.04$ ). The FBI 12-22 subscale model was sparsely reduced to  
13    32 cortical regions, all DTI tracts, and 50 thalamic momenta, but this model was not  
14    statistically significant ( $r = 0.60$ ,  $p = 0.13$ ).

15



#### 1        4. Discussion

2        Through innovative use of multi-block sparse partial least squares analyses we  
3        demonstrated concurrent changes to thalamic morphometry, diffusion measurements,  
4        and cortical thickness in sporadic bvFTD. Sporadic bvFTD group membership was  
5        associated with a reduction in bilateral anterior cortical thickness, increased mean  
6        diffusivity in anterior thalamic radiations, and deflation of the anterior-dorsal aspect  
7        of the thalamus, compared to healthy controls. Moreover, similar regions were  
8        associated with worsening bvFTD disease severity quantified via clinical dementia  
9        rating and behavioural measures.

10       Methodologically, using multi-block methods, we demonstrate that cortical, diffusion,  
11       and shape features can be combined to predict diagnostic group and disease severity.  
12       The association of the multimodality structural neuroimaging features with diagnosis  
13       and disease severity establishes these features as a potential neuroanatomical basis of  
14       a sporadic bvFTD clinical phenotype.

15       Cortical thinning in anterior and temporal regions in our sample of sporadic bvFTD is  
16       expected, given that the diagnoses of bvFTD was made using International bvFTD  
17       Consortium Criteria (Rascovsky et al., 2011) which includes frontal and/or temporal  
18       cortical volume loss as a criterion.

19       Diffusion analyses found predominantly increased MD in the anterior thalamic  
20       radiations bilaterally for bvFTD group classification, and on the left anterior thalamic  
21       radiation for disease severity. This is consistent with the extant literature on group  
22       differences and disease severity in bvFTD, where raised MD is commonly observed  
23       (Daianu et al., 2016; Mahoney et al., 2014; Möller et al., 2015; Tartaglia et al., 2012;  
24       Zhang et al., 2009). Altered DTI metrics in the anterior thalamic radiations are

1 concordant with our shape findings since afferents and efferents from these nuclei  
2 traverse these pathways to the prefrontal cortex. Previously, Schönecker et al. (2018),  
3 using volumetric divisions of the thalamus, demonstrated associations between  
4 anterior thalamic atrophy and reduced frontal-thalamic DTI metrics which were more  
5 pronounced in those with C9ORF72 mutations than healthy controls. This prior study  
6 included a mixed sample of frontotemporal dementia and amyotrophic lateral  
7 sclerosis patients. Here, we demonstrate that the relationship between thalamic  
8 atrophy and frontal-thalamic DTI metric alterations occur in a sporadic bvFTD cohort  
9 as well. Moreover, lower FA and higher MD in all tracts were associated with  
10 behavioural measures, whereas only higher MD in the anterior tracts was predicted by  
11 bvFTD status. This suggests that clinical manifestations of bvFTD may result from  
12 disconnection between the cortex and thalamus.

13 Although the DTI changes are consistent with previous research, the explanatory  
14 pathophysiological mechanisms warrant consideration, particularly given the  
15 bidirectional nature of frontal-thalamic connections. Early in bvFTD, cortical  
16 supragranular layer inclusions and neuronal loss are most characteristically observed,  
17 although inclusions are also present in projection neurons of layer V and VI  
18 (Brettschneider et al., 2014), which contain corticothalamic drivers and modulators  
19 (Sherman, 2007). Thus, both thalamocortical and corticothalamic networks are  
20 affected at the earliest stage of bvFTD. Accordingly, the thalamus appears to be  
21 affected early in FTD and cannot be dismissed as a “downstream” phenomenon to  
22 cortical involvement. Concordantly, studies examining the Papez circuit in bvFTD  
23 have shown that involvement of the thalamic anterior nuclear group is of the same  
24 magnitude as that of the anterior cingulate cortex (Hornberger et al., 2012). Despite  
25 likely early involvement of the thalamus in the bvFTD disease process, the

1 propagation of neuropathology between the cortex and thalamus remains unknown.  
2 Possible mechanisms may include direct white matter pathology, network dysfunction  
3 (Palop & Mucke, 2010), or direct or indirect disconnection from either frontal or  
4 thalamic regions causing trans-synaptic degeneration (Buren, 1963; Looi &  
5 Walterfang, 2013).

6 There is support for our hypothesis of significant involutonal shape change in the  
7 thalamus. Volumetrically, we found smaller thalamic volumes bilaterally, although  
8 statistically significant differences only on the left. This is broadly consistent with  
9 previous volumetric studies (Bocchetta et al., 2018; Cardenas et al., 2007; Garibotto  
10 et al., 2011). However, not all studies of sporadic bvFTD have found volumetric  
11 thalamic atrophy (Schönecker et al., 2018). Regionally, deflation was observed in the  
12 anterior nuclear group (mainly constituted by the anteroventral nucleus), ventral  
13 anterior, and the dorsal nuclei (Morel et al., 1997). Previous regional volumetric  
14 studies have shown conflicting results in sporadic bvFTD; anterior thalamic volumes  
15 have been observed to be reduced (Chow et al., 2008) and also, increased (Bede et al.,  
16 2018). Our previous research demonstrated volumetric reduction in dorsolateral-  
17 connected thalamic regions but increases in orbitofrontal-connected regions (Jakabek  
18 et al., 2018). Prior thalamic shape analyses had examined only genetic bvFTD and  
19 found pre-symptomatic (over five years before clinical symptoms) anterior atrophy  
20 (Cury et al., 2019). In a comprehensive genetic bvFTD study, automated thalamus  
21 parcellation found that the mediodorsal nucleus was the most characteristically  
22 affected sub nucleus (Bocchetta et al., 2018), in contrast to our results. Using shape  
23 analyses rather than predetermined thalamic sub-nuclear volumetric divisions we  
24 demonstrate marked anterior-dorsal atrophy in sporadic bvFTD.

1 From a methodological perspective, our analysis of thalamic shape involves no *a*  
2 *priori* assumptions on the regions of deformation, and thus may have theoretical  
3 advantages over parcellation methods employed in other studies (e.g., Bede et al.,  
4 2018; Bocchetta et al., 2018). Moreover, by utilising the multi-block sparse PLS  
5 framework, we can combine different imaging modalities across subjects to derive  
6 parsimonious correlated predictors of disease or disease severity.

7 Notably, there was minimal involvement of thalamic sensory or motor nuclei. This  
8 suggests that the aberrant processing of tactile sensory information in bvFTD is not  
9 attributable to disturbance in this part of the system. Additionally, the pulvinar was  
10 not affected in our cohort of sporadic bvFTD. This suggests that pulvinar involvement  
11 may be a specific feature of *C9ORF72* bvFTD, in line with other studies (Bocchetta et  
12 al., 2018). Furthermore, there were no significant correlations with the FBI 12-22  
13 subscales. This may be attributed to specific dysexecutive behaviour being correlated  
14 with atrophy of the striatum (e.g., caudate; Macfarlane et al., 2015), whereas thalamic  
15 atrophy may be associated with general cognitive, behavioural and functional decline.  
16 Alternatively, our modest sample size may not have had sufficient power to detect  
17 such an association. Additionally, given the modest sample size, there is the risk of  
18 overfitting using the PLS methodology which we have minimised with the use of  
19 nested cross-validation.

20 In conclusion, we have demonstrated that there is neural network-based thalamic  
21 atrophy in sporadic bvFTD, which, in turn, is correlated with tractography and  
22 cortical changes. Furthermore, these changes are associated with measures of clinical  
23 severity and behavioural disturbance. The characterisation of combination of  
24 neuroanatomical and clinical features may form the basis of a more definitive clinical  
25 phenotype for sporadic bvFTD, while acknowledging the variable genetic basis of

1 sporadic bvFTD. Anterior and dorsal nuclei of the thalamus seem to be most affected  
2 in sporadic bvFTD, whilst ventral and posterior nuclei are affected to a lesser extent.  
3 Considering that thalamic function modulates cortico-cortical communication, this  
4 work provides a new impetus to further examine thalamic imaging and  
5 histopathological changes as potential hallmarks in the spatiotemporal development  
6 and progression of bvFTD.

7

8

1           5. Funding

2       JCLL self-funded travel costs and computer infrastructure to coordinate research in  
3       Australia and Sweden. The LUPROFS study received funding from The Swedish  
4       Alzheimer foundation, Thuréus foundation, and benefited from the regional  
5       agreement on medical training and clinical research (ALF) between the Skåne  
6       Regional Council and Lund University. Funding for AFS was provided by The  
7       Swedish Society for Medical Research and The Bente Rexed Gerstedts Foundation for  
8       Brain Research. This study was an initiative of the Australian, United States,  
9       Scandinavian/Spanish Imaging Exchange (AUSSIE) network founded and  
10      coordinated at the Australian National University School of Medicine and psychology  
11      by JCLL. The funders had no role in study design, data collection and analysis,  
12      decision to publish, or preparation of the manuscript.

13

1        6. References

- 2        Avants, B. B., Epstein, C. L., Grossman, M., & Gee, J. C. (2008). Symmetric  
3        diffeomorphic image registration with cross-correlation: Evaluating automated  
4        labeling of elderly and neurodegenerative brain. *Medical Image Analysis*,  
5        12(1), 26–41. <https://doi.org/10.1016/j.media.2007.06.004>
- 6        Avants, B. B., Libon, D. J., Rascovsky, K., Boller, A., McMillan, C. T., Massimo, L.,  
7        Coslett, H. B., Chatterjee, A., Gross, R. G., & Grossman, M. (2014). Sparse  
8        canonical correlation analysis relates network-level atrophy to multivariate  
9        cognitive measures in a neurodegenerative population. *NeuroImage*, 84, 698–  
10        711. <https://doi.org/10.1016/j.neuroimage.2013.09.048>
- 11       Avants, B. B., Tustison, N. J., & Stone, J. R. (2021). Similarity-driven multi-view  
12       embeddings from high-dimensional biomedical data. *Nature Computational*  
13       *Science*, 1(2), 143–152. <https://doi.org/10.1038/s43588-021-00029-8>
- 14       Bede, P., Omer, T., Finegan, E., Chipika, R. H., Iyer, P. M., Doherty, M. A., Vajda,  
15       A., Pender, N., McLaughlin, R. L., Hutchinson, S., & Hardiman, O. (2018).  
16       Connectivity-based characterisation of subcortical grey matter pathology in  
17       frontotemporal dementia and ALS: A multimodal neuroimaging study. *Brain*  
18       *Imaging and Behavior*, 12(6), 1696–1707. [https://doi.org/10.1007/s11682-](https://doi.org/10.1007/s11682-018-9837-9)  
19       018-9837-9
- 20       Behrens, T. E. J., Johansen-Berg, H., Woolrich, M. W., Smith, S. M., Wheeler-  
21       Kingshott, C. a. M., Boulby, P. A., Barker, G. J., Sillery, E. L., Sheehan, K.,  
22       Ciccarelli, O., Thompson, A. J., Brady, J. M., & Matthews, P. M. (2003).  
23       Non-invasive mapping of connections between human thalamus and cortex  
24       using diffusion imaging. *Nature Neuroscience*, 6(7), 750–757.  
25       <https://doi.org/10.1038/nn1075>

- 1 Blauwendraat, C., Wilke, C., Simón-Sánchez, J., Jansen, I. E., Reifschneider, A.,  
2 Capell, A., Haass, C., Castillo-Lizardo, M., Biskup, S., Maetzler, W., Rizzu,  
3 P., Heutink, P., & Synofzik, M. (2018). The wide genetic landscape of clinical  
4 frontotemporal dementia: Systematic combined sequencing of 121 consecutive  
5 subjects. *Genetics in Medicine*, *20*(2), Article 2.  
6 <https://doi.org/10.1038/gim.2017.102>
- 7 Bocchetta, M., Gordon, E., Cardoso, M. J., Modat, M., Ourselin, S., Warren, J. D., &  
8 Rohrer, J. D. (2018). Thalamic atrophy in frontotemporal dementia—Not just  
9 a C9orf72 problem. *NeuroImage: Clinical*, *18*, 675–681.  
10 <https://doi.org/10.1016/j.nicl.2018.02.019>
- 11 Bône, A., Louis, M., Martin, B., & Durrleman, S. (2018). Deformetrica 4: An Open-  
12 Source Software for Statistical Shape Analysis. In M. Reuter, C. Wachinger,  
13 H. Lombaert, B. Paniagua, M. Lüthi, & B. Egger (Eds.), *Shape in Medical*  
14 *Imaging* (pp. 3–13). Springer International Publishing.  
15 [https://doi.org/10.1007/978-3-030-04747-4\\_1](https://doi.org/10.1007/978-3-030-04747-4_1)
- 16 Brettschneider, J., Del Tredici, K., Irwin, D. J., Grossman, M., Robinson, J. L.,  
17 Toledo, J. B., Fang, L., Van Deerlin, V. M., Ludolph, A. C., Lee, V. M.-Y.,  
18 Braak, H., & Trojanowski, J. Q. (2014). Sequential distribution of pTDP-43  
19 pathology in behavioral variant frontotemporal dementia (bvFTD). *Acta*  
20 *Neuropathologica*, *127*(3), 423–439. [https://doi.org/10.1007/s00401-013-](https://doi.org/10.1007/s00401-013-1238-y)  
21 [1238-y](https://doi.org/10.1007/s00401-013-1238-y)
- 22 Buren, J. M. V. (1963). Trans-synaptic retrograde degeneration in the visual system of  
23 primates. *Journal of Neurology, Neurosurgery & Psychiatry*, *26*(5), 402–409.  
24 <https://doi.org/10.1136/jnnp.26.5.402>



- 1 Cardenas, V. A., Boxer, A. L., Chao, L. L., Gorno-Tempini, M. L., Miller, B. L.,  
2 Weiner, M. W., & Studholme, C. (2007). Deformation Morphometry Reveals  
3 Brain Atrophy in Frontotemporal Dementia. *Archives of Neurology*, *64*(6),  
4 873–877. <https://doi.org/10.1001/archneur.64.6.873>
- 5 Cash, D. M., Bocchetta, M., Thomas, D. L., Dick, K. M., van Swieten, J. C., Borroni,  
6 B., Galimberti, D., Masellis, M., Tartaglia, M. C., Rowe, J. B., Graff, C.,  
7 Tagliavini, F., Frisoni, G. B., Laforce, R., Finger, E., de Mendonça, A., Sorbi,  
8 S., Rossor, M. N., Ourselin, S., ... Warren, J. (2018). Patterns of gray matter  
9 atrophy in genetic frontotemporal dementia: Results from the GENFI study.  
10 *Neurobiology of Aging*, *62*, 191–196.  
11 <https://doi.org/10.1016/j.neurobiolaging.2017.10.008>
- 12 Cawley, G. C., & Talbot, N. L. C. (2010). On Over-fitting in Model Selection and  
13 Subsequent Selection Bias in Performance Evaluation. *Journal of Machine*  
14 *Learning Research*, *11*(70), 2079–2107.
- 15 Chen, K., Reiman, E. M., Huan, Z., Caselli, R. J., Bandy, D., Ayutyanont, N., &  
16 Alexander, G. E. (2009). Linking Functional and Structural Brain Images with  
17 Multivariate Network Analyses: A Novel Application of the Partial Least  
18 Square Method. *NeuroImage*, *47*(2), 602–610.  
19 <https://doi.org/10.1016/j.neuroimage.2009.04.053>
- 20 Chow, T. W., Izenberg, A., Binns, M. A., Freedman, M., Stuss, D. T., Scott, C. J. M.,  
21 Ramirez, J., & Black, S. E. (2008). Magnetic Resonance Imaging in  
22 Frontotemporal Dementia Shows Subcortical Atrophy. *Dementia and*  
23 *Geriatric Cognitive Disorders*, *26*(1), 79–88.  
24 <https://doi.org/10.1159/000144028>

- 1 Cury, C., Durrleman, S., Cash, D. M., Lorenzi, M., Nicholas, J. M., Bocchetta, M.,  
2 van Swieten, J. C., Borroni, B., Galimberti, D., Masellis, M., Tartaglia, M. C.,  
3 Rowe, J. B., Graff, C., Tagliavini, F., Frisoni, G. B., Laforce, R., Finger, E., de  
4 Mendonça, A., Sorbi, S., ... Warren, J. (2019). Spatiotemporal analysis for  
5 detection of pre-symptomatic shape changes in neurodegenerative diseases:  
6 Initial application to the GENFI cohort. *NeuroImage*, *188*, 282–290.  
7 <https://doi.org/10.1016/j.neuroimage.2018.11.063>
- 8 Daianu, M., Mendez, M. F., Baboyan, V. G., Jin, Y., Melrose, R. J., Jimenez, E. E., &  
9 Thompson, P. M. (2016). An advanced white matter tract analysis in  
10 frontotemporal dementia and early-onset Alzheimer's disease. *Brain Imaging*  
11 *and Behavior*, *10*(4), 1038–1053. <https://doi.org/10.1007/s11682-015-9458-5>
- 12 Diehl-Schmid, J., Licata, A., Goldhardt, O., Förstl, H., Yakushew, I., Otto, M.,  
13 Anderl-Straub, S., Beer, A., Ludolph, A. C., Landwehrmeyer, G. B., Levin, J.,  
14 Danek, A., Fliessbach, K., Spottke, A., Fassbender, K., Lyros, E., Prudlo, J.,  
15 Krause, B. J., Volk, A., ... Grimmer, T. (2019). FDG-PET underscores the  
16 key role of the thalamus in frontotemporal lobar degeneration caused by  
17 C9ORF72 mutations. *Translational Psychiatry*, *9*(1), 1–11.  
18 <https://doi.org/10.1038/s41398-019-0381-1>
- 19 Durrleman, S., Prastawa, M., Charon, N., Korenberg, J. R., Joshi, S., Gerig, G., &  
20 Trouvé, A. (2014). Morphometry of anatomical shape complexes with dense  
21 deformations and sparse parameters. *NeuroImage*, *101*, 35–49.  
22 <https://doi.org/10.1016/j.neuroimage.2014.06.043>
- 23 Fischl, B., & Dale, A. M. (2000). Measuring the thickness of the human cerebral  
24 cortex from magnetic resonance images. *Proceedings of the National*

- 1            *Academy of Sciences*, 97(20), 11050–11055.
- 2            <https://doi.org/10.1073/pnas.200033797>
- 3    Garibotto, V., Borroni, B., Agosti, C., Premi, E., Alberici, A., Eickhoff, S. B.,
- 4            Brambati, S. M., Bellelli, G., Gasparotti, R., Perani, D., & Padovani, A.
- 5            (2011). Subcortical and deep cortical atrophy in Frontotemporal Lobar
- 6            Degeneration. *Neurobiology of Aging*, 32(5), 875–884.
- 7            <https://doi.org/10.1016/j.neurobiolaging.2009.05.004>
- 8    Hoagey, D. A., Rieck, J. R., Rodrigue, K. M., & Kennedy, K. M. (2019). Joint
- 9            contributions of cortical morphometry and white matter microstructure in
- 10            healthy brain aging: A partial least squares correlation analysis. *Human Brain*
- 11            *Mapping*, 40(18), 5315–5329. <https://doi.org/10.1002/hbm.24774>
- 12    Hock, E.-M., & Polymenidou, M. (2016). Prion-like propagation as a pathogenic
- 13            principle in frontotemporal dementia. *Journal of Neurochemistry*, 138, 163–
- 14            183. <https://doi.org/10.1111/jnc.13668>
- 15    Hornberger, M., Wong, S., Tan, R., Irish, M., Piguet, O., Kril, J., Hodges, J. R., &
- 16            Halliday, G. (2012). In vivo and post-mortem memory circuit integrity in
- 17            frontotemporal dementia and Alzheimer’s disease. *Brain*, 135(10), 3015–
- 18            3025. <https://doi.org/10.1093/brain/aws239>
- 19    Hua, K., Zhang, J., Wakana, S., Jiang, H., Li, X., Reich, D. S., Calabresi, P. A., Pekar,
- 20            J. J., van Zijl, P. C. M., & Mori, S. (2008). Tract Probability Maps in
- 21            Stereotaxic Spaces: Analyses of White Matter Anatomy and Tract-Specific
- 22            Quantification. *NeuroImage*, 39(1), 336–347.
- 23            <https://doi.org/10.1016/j.neuroimage.2007.07.053>
- 24    Hwang, K., Bertolero, M. A., Liu, W. B., & D’Esposito, M. (2017). The Human
- 25            Thalamus Is an Integrative Hub for Functional Brain Networks. *The Journal*

1           of *Neuroscience*, 37(23), 5594–5607.

2           <https://doi.org/10.1523/JNEUROSCI.0067-17.2017>

3   Jakabek, D., Power, B. D., Macfarlane, M. D., Walterfang, M., Velakoulis, D.,

4           Westen, D. van, Lätt, J., Nilsson, M., Looi, J. C. L., & Santillo, A. F. (2018).

5           Regional structural hypo- and hyperconnectivity of frontal–striatal and

6           frontal–thalamic pathways in behavioral variant frontotemporal dementia.

7           *Human Brain Mapping*, 39(10), 4083–4093.

8           <https://doi.org/10.1002/hbm.24233>

9   Kertesz, A., Davidson, W., & Fox, H. (1997). Frontal behavioral inventory:

10           Diagnostic criteria for frontal lobe dementia. *The Canadian Journal of*

11           *Neurological Sciences. Le Journal Canadien Des Sciences Neurologiques*,

12           24(1), 29–36.

13   Knopman, D. S., Kramer, J. H., Boeve, B. F., Caselli, R. J., Graff-Radford, N. R.,

14           Mendez, M. F., Miller, B. L., & Mercaldo, N. (2008). Development of

15           methodology for conducting clinical trials in frontotemporal lobar

16           degeneration. *Brain*, 131(11), 2957–2968.

17           <https://doi.org/10.1093/brain/awn234>

18   Lee, S. E., Khazenzon, A. M., Trujillo, A. J., Guo, C. C., Yokoyama, J. S., Sha, S. J.,

19           Takada, L. T., Karydas, A. M., Block, N. R., Coppola, G., Pribadi, M.,

20           Geschwind, D. H., Rademakers, R., Fong, J. C., Weiner, M. W., Boxer, A. L.,

21           Kramer, J. H., Rosen, H. J., Miller, B. L., & Seeley, W. W. (2014). Altered

22           network connectivity in frontotemporal dementia with C9orf72 hexanucleotide

23           repeat expansion. *Brain*, 137(11), 3047–3060.

24           <https://doi.org/10.1093/brain/awu248>

- 1 Looi, J. C. L., & Walterfang, M. (2013). Striatal morphology as a biomarker in  
2 neurodegenerative disease. *Molecular Psychiatry*, *18*(4), 417–424.  
3 <https://doi.org/10.1038/mp.2012.54>
- 4 Looi, J. C. L., Walterfang, M., Nilsson, C., Power, B. D., van Westen, D., Velakoulis,  
5 D., Wahlund, L.-O., & Thompson, P. M. (2014). The subcortical connectome:  
6 Hubs, spokes and the space between - a vision for further research in  
7 neurodegenerative disease. *The Australian and New Zealand Journal of*  
8 *Psychiatry*, *48*(4), 306–309. <https://doi.org/10.1177/0004867413506753>
- 9 Macfarlane, M. D., Jakabek, D., Walterfang, M., Vestberg, S., Velakoulis, D., Wilkes,  
10 F. A., Nilsson, C., van Westen, D., Looi, J. C. L., & Santillo, A. F. (2015).  
11 Striatal Atrophy in the Behavioural Variant of Frontotemporal Dementia:  
12 Correlation with Diagnosis, Negative Symptoms and Disease Severity. *PLoS*  
13 *One*, *10*(6), e0129692. <https://doi.org/10.1371/journal.pone.0129692>
- 14 Mahoney, C. J., Ridgway, G. R., Malone, I. B., Downey, L. E., Beck, J., Kinnunen,  
15 K. M., Schmitz, N., Golden, H. L., Rohrer, J. D., Schott, J. M., Rossor, M. N.,  
16 Ourselin, S., Mead, S., Fox, N. C., & Warren, J. D. (2014). Profiles of white  
17 matter tract pathology in frontotemporal dementia. *Human Brain Mapping*,  
18 *35*(8), 4163–4179. <https://doi.org/10.1002/hbm.22468>
- 19 McIntosh, A. R., & Lobaugh, N. J. (2004). Partial least squares analysis of  
20 neuroimaging data: Applications and advances. *NeuroImage*, *23*, S250–S263.  
21 <https://doi.org/10.1016/j.neuroimage.2004.07.020>
- 22 Möller, C., Hafkemeijer, A., Pijnenburg, Y. A. L., Rombouts, S. A. R. B., van der  
23 Grond, J., Dopper, E., van Swieten, J., Versteeg, A., Pouwels, P. J. W.,  
24 Barkhof, F., Scheltens, P., Vrenken, H., & van der Flier, W. M. (2015). Joint  
25 assessment of white matter integrity, cortical and subcortical atrophy to

- 1 distinguish AD from behavioral variant FTD: A two-center study.  
2 *NeuroImage: Clinical*, 9, 418–429. <https://doi.org/10.1016/j.nicl.2015.08.022>
- 3 Morel, A., Magnin, M., & Jeanmonod, D. (1997). Multiarchitectonic and stereotactic  
4 atlas of the human thalamus. *Journal of Comparative Neurology*, 387(4), 588–  
5 630. [https://doi.org/10.1002/\(SICI\)1096-9861\(19971103\)387:4<588::AID-  
6 CNE8>3.0.CO;2-Z](https://doi.org/10.1002/(SICI)1096-9861(19971103)387:4<588::AID-CNE8>3.0.CO;2-Z)
- 7 Nilsson, M., Szczepankiewicz, F., Westen, D. van, & Hansson, O. (2015).  
8 Extrapolation-Based References Improve Motion and Eddy-Current  
9 Correction of High B-Value DWI Data: Application in Parkinson’s Disease  
10 Dementia. *PLOS ONE*, 10(11), e0141825.  
11 <https://doi.org/10.1371/journal.pone.0141825>
- 12 Palop, J. J., & Mucke, L. (2010). Synaptic Depression and Aberrant Excitatory  
13 Network Activity in Alzheimer’s Disease: Two Faces of the Same Coin?  
14 *Neuromolecular Medicine*, 12(1), 48–55. [https://doi.org/10.1007/s12017-009-  
15 8097-7](https://doi.org/10.1007/s12017-009-8097-7)
- 16 Power, B. D., & Looi, J. C. (2015). The thalamus as a putative biomarker in  
17 neurodegenerative disorders. *Australian & New Zealand Journal of  
18 Psychiatry*, 49(6), 502–518. <https://doi.org/10.1177/0004867415585857>
- 19 Power, B. D., Wilkes, F. A., Hunter-Dickson, M., van Westen, D., Santillo, A. F.,  
20 Walterfang, M., Nilsson, C., Velakoulis, D., & J. C. L. Looi. (2015).  
21 Validation of a protocol for manual segmentation of the thalamus on magnetic  
22 resonance imaging scans. *Psychiatry Research*, 232(1), 98–105.  
23 <https://doi.org/10.1016/j.psychresns.2015.02.001>
- 24 Rascovsky, K., Hodges, J. R., Knopman, D., Mendez, M. F., Kramer, J. H., Neuhaus,  
25 J., Swieten, J. C. van, Seelaar, H., Dopper, E. G. P., Onyike, C. U., Hillis, A.

- 1 E., Josephs, K. A., Boeve, B. F., Kertesz, A., Seeley, W. W., Rankin, K. P.,  
2 Johnson, J. K., Gorno-Tempini, M.-L., Rosen, H., ... Miller, B. L. (2011).  
3 Sensitivity of revised diagnostic criteria for the behavioural variant of  
4 frontotemporal dementia. *Brain*, *134*(9), 2456–2477.  
5 <https://doi.org/10.1093/brain/awr179>
- 6 Rohart, F., Gautier, B., Singh, A., & Cao, K.-A. L. (2017). mixOmics: An R package  
7 for ‘omics feature selection and multiple data integration. *PLOS*  
8 *Computational Biology*, *13*(11), e1005752.  
9 <https://doi.org/10.1371/journal.pcbi.1005752>
- 10 Santillo, A. F., Mårtensson, J., Lindberg, O., Nilsson, M., Manzouri, A., Waldö, M.  
11 L., Westen, D. van, Wahlund, L.-O., Lätt, J., & Nilsson, C. (2013). Diffusion  
12 Tensor Tractography versus Volumetric Imaging in the Diagnosis of  
13 Behavioral Variant Frontotemporal Dementia. *PLOS ONE*, *8*(7), e66932.  
14 <https://doi.org/10.1371/journal.pone.0066932>
- 15 Schönecker, S., Neuhofer, C., Otto, M., Ludolph, A., Kassubek, J., Landwehrmeyer,  
16 B., Anderl-Straub, S., Semler, E., Diehl-Schmid, J., Prix, C., Vollmar, C.,  
17 Fortea, J., Huppertz, H.-J., Arzberger, T., Edbauer, D., Feddersen, B.,  
18 Dieterich, M., Schroeter, M. L., Volk, A. E., ... Levin, J. (2018). Atrophy in  
19 the Thalamus But Not Cerebellum Is Specific for C9orf72 FTD and ALS  
20 Patients – An Atlas-Based Volumetric MRI Study. *Frontiers in Aging*  
21 *Neuroscience*, *10*, 45. <https://doi.org/10.3389/fnagi.2018.00045>
- 22 Sherman, S. M. (2007). The thalamus is more than just a relay. *Current Opinion in*  
23 *Neurobiology*, *17*(4), 417–422. <https://doi.org/10.1016/j.conb.2007.07.003>
- 24 Singh, A., Shannon, C. P., Gautier, B., Rohart, F., Vacher, M., Tebbutt, S. J., & Lê  
25 Cao, K.-A. (2019). DIABLO: An integrative approach for identifying key

- 1           molecular drivers from multi-omics assays. *Bioinformatics*, 35(17), 3055–  
2           3062. <https://doi.org/10.1093/bioinformatics/bty1054>
- 3   Smith, S. M., Jenkinson, M., Johansen-Berg, H., Rueckert, D., Nichols, T. E.,  
4           Mackay, C. E., Watkins, K. E., Ciccarelli, O., Cader, M. Z., Matthews, P. M.,  
5           & Behrens, T. E. J. (2006). Tract-based spatial statistics: Voxelwise analysis  
6           of multi-subject diffusion data. *NeuroImage*, 31(4), 1487–1505.  
7           <https://doi.org/10.1016/j.neuroimage.2006.02.024>
- 8   Styner, M., Oguz, I., Xu, S., Brechbuhler, C., Pantazis, D., Levitt, J. J., Shenton, M.  
9           E., & Gerig, G. (2006). Framework for the statistical shape analysis of brain  
10           structures using SPHARM-PDM. *The Insight Journal*, 1071, 242–250.
- 11   Tartaglia, M. C., Zhang, Y., Racine, C., Laluz, V., Neuhaus, J., Chao, L., Kramer, J.,  
12           Rosen, H., Miller, B., & Weiner, M. (2012). Executive dysfunction in  
13           frontotemporal dementia is related to abnormalities in frontal white matter  
14           tracts. *Journal of Neurology*, 259(6), 1071–1080.  
15           <https://doi.org/10.1007/s00415-011-6300-x>
- 16   Wagner, M., Lorenz, G., Volk, A. E., Brunet, T., Edbauer, D., Berutti, R., Zhao, C.,  
17           Anderl-Straub, S., Bertram, L., Danek, A., Deschauer, M., Dill, V.,  
18           Fassbender, K., Fliessbach, K., Götze, K. S., Jahn, H., Kornhuber, J.,  
19           Landwehrmeyer, B., Lauer, M., ... Winkelmann, J. (2021). Clinico-genetic  
20           findings in 509 frontotemporal dementia patients. *Molecular Psychiatry*,  
21           26(10), Article 10. <https://doi.org/10.1038/s41380-021-01271-2>
- 22   Yang, Y., Halliday, G. M., Hodges, J. R., & Tan, R. H. (2017). Von Economo Neuron  
23           Density and Thalamus Volumes in Behavioral Deficits in Frontotemporal  
24           Dementia Cases with and without a C9ORF72 Repeat Expansion. *Journal of*  
25           *Alzheimer's Disease*, 58(3), 701–709. <https://doi.org/10.3233/JAD-170002>



1 Zamboni, G., Huey, E. D., Krueger, F., Nichelli, P. F., & Grafman, J. (2008). Apathy  
2 and disinhibition in frontotemporal dementia. *Neurology*, *71*(10), 736–742.  
3 <https://doi.org/10.1212/01.wnl.0000324920.96835.95>

4 Zhang, Y., Schuff, N., Du, A.-T., Rosen, H. J., Kramer, J. H., Gorno-Tempini, M. L.,  
5 Miller, B. L., & Weiner, M. W. (2009). White matter damage in  
6 frontotemporal dementia and Alzheimer’s disease measured by diffusion MRI.  
7 *Brain*, *132*(9), 2579–2592. <https://doi.org/10.1093/brain/awp071>

8

1        7. Tables

2        Table 1. Participant characteristics and structural data

| Demographics                      | Control |     | bvFTD |     |
|-----------------------------------|---------|-----|-------|-----|
| n                                 | 24      |     | 23    |     |
| Male                              | 11      |     | 15    |     |
|                                   | M       | SD  | M     | SD  |
| Age                               | 66      | 11  | 69    | 8   |
| Education (years)                 | 12      | 3   | 10    | 3   |
| MMSE                              | 29*     | 1   | 22    | 5   |
| FTLD-CDR-SB                       |         |     | 8.7   | 3.8 |
| FBI Total score                   |         |     | 26.2  | 8.2 |
| FBI 1-10 score                    |         |     | 16.0  | 5.5 |
| FBI 12-22 score                   |         |     | 9.2   | 4.7 |
| Left thalamus (mm <sup>3</sup> )  | 4714    | 644 | 4083  | 724 |
| Right thalamus (mm <sup>3</sup> ) | 4681    | 644 | 4224  | 737 |

3

4        Abbreviations: bvFTD = Behavioural Variant Frontotemporal Dementia; FTLD-  
5        CDR-SB = Frontotemporal lobar degeneration clinical dementia rating tool sum of  
6        boxes score; FBI = Frontal Behavioural Inventory; MMSE = Mini Mental state  
7        examination. \* MMSE available for 13 participants.

8

9

1 Table 2. Tract-based spatial statistics results

| Tract                   | Control |       | bvFTD |       | Beta   | SE    | p-value |
|-------------------------|---------|-------|-------|-------|--------|-------|---------|
|                         | M       | SE    | M     | SE    |        |       |         |
| FA                      |         |       |       |       |        |       |         |
| Left ATR                | 0.497   | 0.012 | 0.440 | 0.012 | -0.057 | 0.017 | 0.002   |
| Right ATR               | 0.491   | 0.012 | 0.426 | 0.013 | -0.065 | 0.018 | 0.001   |
| Left PTR                | 0.453   | 0.009 | 0.429 | 0.010 | -0.024 | 0.014 | 0.082   |
| Right PTR               | 0.453   | 0.009 | 0.429 | 0.010 | -0.024 | 0.014 | 0.082   |
| MD ( $\times 10^{-4}$ ) |         |       |       |       |        |       |         |
| Left ATR                | 0.761   | 0.020 | 0.889 | 0.020 | 0.128  | 0.028 | <0.001  |
| Right ATR               | 0.743   | 0.019 | 0.849 | 0.020 | 0.106  | 0.028 | <0.001  |
| Left PTR                | 0.835   | 0.017 | 0.896 | 0.018 | 0.061  | 0.025 | 0.018   |
| Right PTR               | 0.841   | 0.018 | 0.931 | 0.019 | 0.090  | 0.026 | 0.001   |

2

3

4 Estimated marginal means shown adjusted for age. M= mean, SE= Standard Error of

5 the Mean. FA = fractional anisotropy, MD = mean diffusivity, ATR = anterior

6 thalamic radiation, PTR = posterior thalamic radiation.

1        8. Figure legends

2        Figure 1. Sparse PLS-DA group comparison

3

4        Legend: Multiblock group comparison. Panel A shows cortical loading values for the  
5        sparse model. Panel B shows displacement from an average thalamic shape after  
6        deformation by sparsely selected momenta. Panel C shows sparsely selected DTI  
7        tracts. ATR, anterior thalamic radiation; PTR, posterior thalamic radiation; FA,  
8        fractional anisotropy; MD, mean diffusivity. Scales show relative weighting in the  
9        discrimination selection model and are comparable in colour between Panels A and B.

1 Figure 2. Sparse PLS association with FTLD-CDR-SB

2

3 Legend: Multiblock group comparison. Panel A shows cortical loading values for the

4 sparse model. Panel B shows displacement from an average thalamic shape after

5 deformation by sparsely selected momenta. Panel C shows sparsely selected DTI

6 tracts. ATR, anterior thalamic radiation; PTR, posterior thalamic radiation; FA,

7 fractional anisotropy; MD, mean diffusivity. Scales show weighting in the

8 discrimination selection model and are comparable in colour between Panels A and B.

1 Figure 3. Sparse PLS association with FBI total score

2

3 Legend: Multiblock group comparison. Panel A shows cortical loading values for the

4 sparse model. Panel B shows displacement from an average thalamic shape after

5 deformation by sparsely selected momenta. Panel C shows sparsely selected DTI

6 tracts. ATR, anterior thalamic radiation; PTR, posterior thalamic radiation; FA,

7 fractional anisotropy; MD, mean diffusivity. Scales show weighting in the

8 discrimination selection model and are comparable in colour between Panels A and B.

- 1 Figure 4. Sparse PLS association with FBI score on items 1 to 10.
- 2
- 3 Legend: Multiblock group comparison. Panel A shows cortical loading values for the
- 4 sparse model. Panel B shows displacement from an average thalamic shape after
- 5 deformation by sparsely selected momenta. Panel C shows sparsely selected DTI
- 6 tracts. ATR, anterior thalamic radiation; PTR, posterior thalamic radiation; FA,
- 7 fractional anisotropy; MD, mean diffusivity. Scales show weighting in the
- 8 discrimination selection model and are comparable in colour between Panels A and B.

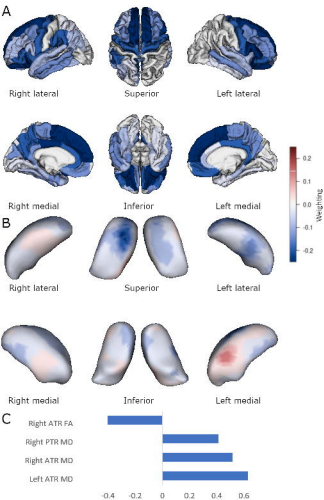



**A**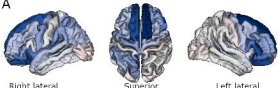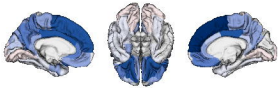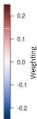**B**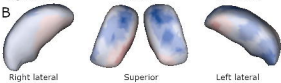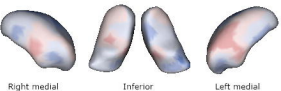**C**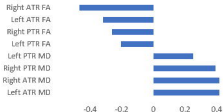

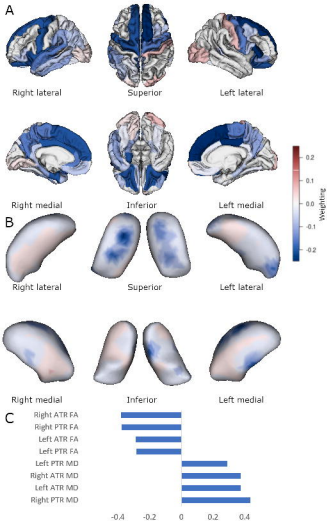

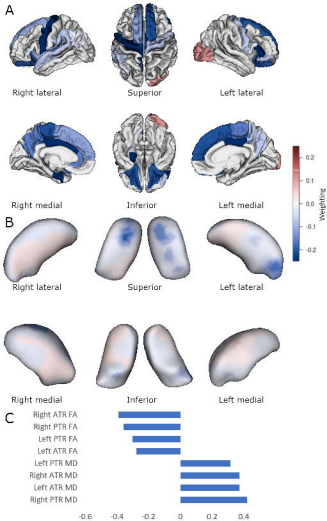

Source: https://medrxiv.org/content/10.1101/2023.03.31.23287956v1.full.pdf
